# Supplementary material
Source: PubMed Central journal article supplement (PMC2654780)
Supplement: NIHMS95062-supplement-supp_info.pdf [file NIHMS95062-supplement-supp_info.pdf]

**Supplementary Material for Michel & Bren, “Submolecular Unfolding Units in *Pseudomonas aeruginosa* Cytochrome *c*<sub>551</sub>”**

**Table S1**  $\Delta G_{HX}$  values (kJ/mol) for residues in *Pa* cyt *c*<sub>551</sub> in the presence of GuHCl. Blank boxes represent prolines or residues which exchanged too quickly to measure an exchange rate.

|    | [GuHCl]: | 0 M  | 0.2 M | 0.4 M | 0.6 M | 0.8 M | 1.0 M | 1.2 M | 1.4 M |
|----|----------|------|-------|-------|-------|-------|-------|-------|-------|
| 3  | Pro      |      |       |       |       |       |       |       |       |
| 4  | Glu      | 17.6 | 5.4   |       |       |       |       |       |       |
| 5  | Val      |      |       |       |       |       |       |       |       |
| 6  | Leu      |      |       |       |       |       |       |       |       |
| 7  | Phe      | 13.9 | 9.6   |       |       | 15.4  |       | 15.0  |       |
| 8  | Lys      | 16.4 | 18.3  |       |       |       |       |       |       |
| 9  | Asn      |      |       |       |       |       |       |       |       |
| 10 | Lys      | 19.5 | 16.5  | 18.3  | 18.5  |       |       |       |       |
| 11 | Gly      |      |       |       |       |       |       |       |       |
| 12 | Cys      |      |       |       |       |       |       |       |       |
| 13 | Val      | 16.0 | 16.9  | 17.2  | 16.0  | 15.2  | 16.8  | 17.4  | 14.2  |
| 14 | Ala      | 15.3 | 16.2  | 18.3  | 16.4  | 17.1  | 16.1  | 17.3  | 15.2  |
| 15 | Cys      | 25.4 | 25.0  | 24.9  | 24.5  | 24.3  | 22.8  | 22.1  | 19.9  |
| 16 | His      | 33.7 | 31.8  | 32.7  | 30.6  | 28.7  | 26.1  | 22.0  | 20.3  |
| 17 | Ala      | 26.0 | 24.4  | 23.2  | 22.1  | 21.6  | 19.8  | 19.3  |       |
| 18 | Ile      |      |       |       |       |       |       |       |       |
| 19 | Asp      |      |       |       |       |       |       |       |       |
| 20 | Thr      |      |       |       |       |       |       |       |       |
| 21 | Lys      |      |       |       |       |       |       |       |       |
| 22 | Met      |      |       |       |       |       |       |       |       |
| 23 | Val      |      |       |       |       |       |       |       |       |
| 24 | Gly      | 23.8 | 22.6  | 21.5  | 20.5  | 19.5  | 18.5  | 16.4  | 15.8  |
| 25 | Pro      |      |       |       |       |       |       |       |       |
| 26 | Ala      | 17.3 | 17.0  | 17.4  | 14.9  | 15.1  | 15.5  | 17.0  |       |
| 27 | Tyr      | 15.4 | 20.2  | 16.1  | 15.9  | 18.4  | 19.6  | 18.4  |       |
| 28 | Lys      | 17.6 | 18.0  | 17.7  | 17.1  | 17.0  | 16.9  | 18.5  |       |
| 29 | Asp      | 21.3 | 18.8  | 18.1  | 16.6  | 15.5  | 14.8  | 12.4  |       |
| 30 | Val      | 22.4 | 18.7  | 17.6  | 16.1  | 15.0  | 14.0  | 12.0  | 10.1  |
| 31 | Ala      | 24.6 | 22.3  | 20.5  | 18.3  | 17.4  | 16.5  | 15.5  | 14.9  |
| 32 | Ala      | 23.7 | 22.8  | 20.1  | 19.2  | 18.4  | 17.1  | 15.2  | 15.7  |
| 33 | Lys      | 22.5 | 20.9  | 19.8  | 18.1  | 18.2  | 16.0  | 15.9  | 18.3  |
| 34 | Phe      | 21.0 | 19.2  | 18.5  | 16.8  | 16.8  | 17.1  | 15.7  |       |
| 35 | Ala      | 16.7 | 16.3  |       |       |       |       |       |       |
| 36 | Gly      |      |       |       |       |       |       |       |       |
| 37 | Gln      | 19.8 | 23.0  | 21.6  |       | 18.7  | 19.0  | 19.8  | 18.8  |
| 38 | Ala      |      |       |       |       |       |       |       |       |
| 39 | Gly      |      |       |       |       |       |       |       |       |
| 40 | Ala      | 16.8 | 12.0  |       |       |       |       |       |       |

|    | [GuHCl]: | 0 M  | 0.2 M | 0.4 M | 0.6 M | 0.8 M | 1.0 M | 1.2 M | 1.4 M |
|----|----------|------|-------|-------|-------|-------|-------|-------|-------|
| 41 | Glu      |      |       |       |       |       |       |       |       |
| 42 | Ala      | 15.3 | 12.8  | 13.9  | 14.5  | 13.2  | 18.0  | 15.9  | 17.1  |
| 43 | Glu      |      |       |       |       |       |       |       |       |
| 44 | Leu      | 20.7 | 19.5  | 18.9  | 18.0  | 17.2  | 15.4  | 12.9  | 11.0  |
| 45 | Ala      | 22.6 | 21.8  | 23.8  | 23.8  | 21.0  | 18.3  | 15.6  | 13.2  |
| 46 | Gln      | 23.0 | 22.4  | 22.1  | 21.2  | 20.8  | 18.7  | 16.5  | 15.2  |
| 47 | Arg      | 30.4 | 28.4  | 27.6  | 25.6  | 23.1  | 19.4  | 17.5  |       |
| 48 | Ile      | 34.2 | 28.8  | 27.3  | 23.2  | 21.5  | 18.6  | 14.8  | 12.2  |
| 49 | Lys      | 31.9 | 29.0  | 27.2  | 23.3  | 21.5  | 16.9  | 16.6  | 13.4  |
| 50 | Asn      | 30.8 | 28.3  | 26.7  | 24.1  | 22.4  | 20.0  | 18.1  |       |
| 51 | Gly      | 33.9 | 30.3  | 28.3  | 24.9  | 22.4  | 20.9  | 17.1  |       |
| 52 | Ser      | 33.4 | 30.0  | 27.8  | 25.4  | 22.3  | 19.4  | 18.1  |       |
| 53 | Gln      |      |       |       |       |       |       |       |       |
| 54 | Gly      | 16.9 | 15.3  | 20.1  | 18.1  |       |       |       |       |
| 55 | Val      | 15.8 | 15.9  | 15.9  | 13.5  | 15.1  | 13.2  | 14.3  | 12.2  |
| 56 | Trp      | 20.5 | 19.5  | 18.8  | 18.9  | 17.5  | 15.7  | 16.1  | 11.6  |
| 57 | Gly      | 19.4 | 19.4  | 18.3  | 18.1  | 17.5  | 18.1  | 17.7  | 16.4  |
| 58 | Pro      |      |       |       |       |       |       |       |       |
| 59 | Ile      | 11.3 | 8.7   | 11.9  | 10.8  | 8.2   | 10.7  | 10.6  | 10.4  |
| 60 | Pro      |      |       |       |       |       |       |       |       |
| 61 | Met      | 28.6 | 25.2  | 24.8  | 23.4  | 22.1  | 19.3  | 17.1  | 14.1  |
| 62 | Pro      |      |       |       |       |       |       |       |       |
| 63 | Pro      |      |       |       |       |       |       |       |       |
| 64 | Asn      | 24.2 | 20.7  | 20.4  | 19.5  | 19.7  | 19.1  | 20.3  | 18.7  |
| 65 | Ala      |      |       |       |       |       |       |       |       |
| 66 | Val      | 14.3 | 14.4  | 14.3  | 13.0  | 13.1  | 12.2  | 13.9  | 11.6  |
| 67 | Ser      | 20.5 | 20.8  | 20.8  | 19.1  | 18.7  | 18.6  | 19.5  | 20.1  |
| 68 | Asp      |      |       |       |       |       |       |       |       |
| 69 | Asp      |      |       |       |       |       |       |       |       |
| 70 | Glu      | 13.2 | 10.0  | 15.5  | 14.4  | 15.4  |       |       |       |
| 71 | Ala      | 26.6 | 26.2  | 26.6  | 23.8  | 21.6  | 19.5  | 17.7  | 13.7  |
| 72 | Gln      | 27.4 | 25.8  | 25.5  | 23.6  | 22.0  | 18.9  | 16.9  | 16.5  |
| 73 | Thr      | 23.8 | 24.5  | 24.0  | 22.9  | 20.6  | 18.5  | 18.9  |       |
| 74 | Leu      | 33.5 | 28.5  | 25.0  | 22.2  | 20.9  | 16.4  | 14.4  | 12.4  |
| 75 | Ala      | 35.3 | 28.9  | 28.6  | 22.7  | 21.1  | 18.5  | 15.5  | 14.3  |
| 76 | Lys      | 35.0 | 29.9  | 29.2  | 25.2  | 22.8  | 19.1  | 16.7  | 14.0  |
| 77 | Trp      | 32.3 | 30.0  | 28.6  | 24.2  | 22.0  | 17.7  | 16.0  | 12.3  |
| 78 | Val      | 32.7 | 26.4  | 24.5  | 21.3  | 20.4  | 16.9  | 14.0  | 11.2  |
| 79 | Leu      | 32.1 | 27.6  | 26.0  | 21.3  | 20.3  | 16.3  | 15.0  | 10.8  |
| 80 | Ser      | 28.6 | 27.6  | 26.1  | 24.0  | 21.3  | 18.8  | 18.7  |       |
| 81 | Gln      |      |       |       |       |       |       |       |       |
| 82 | Lys      |      |       |       |       |       |       |       |       |

**Table S2** To confirm the HX experiments in GuHCl were within the EX2 limit, the observed exchange rates for *Pa* cyt  $c_{551}$  in 1.4 M GuHCl at pH 5 and 1.4 M GuHCl at pH 6 were compared. The  $\log(k_{\text{obs}})$  values are ~10 fold higher at pH 5 compared to the values at pH 6, as expected for a protein exchanging within the EX2 limit.

| <b>Residue</b> | <b>AA</b> | <b><math>\log(k_{\text{obs}})</math> pH 5</b> | <b><math>\log(k_{\text{obs}})</math> pH 6</b> |
|----------------|-----------|-----------------------------------------------|-----------------------------------------------|
| 13             | Val       | -3.9                                          | -2.9                                          |
| 14             | Ala       | -3.8                                          | -3.0                                          |
| 24             | Gly       | -3.6                                          | -2.8                                          |
| 30             | Val       | -3.9                                          | -2.8                                          |
| 31             | Ala       | -3.5                                          | -2.9                                          |
| 44             | Leu       | -3.9                                          | -2.8                                          |
| 45             | Ala       | -3.8                                          | -2.7                                          |
| 46             | Gln       | -3.7                                          | -2.8                                          |
| 48             | Ile       | -3.9                                          | -2.8                                          |
| 49             | Lys       | -3.4                                          | -2.8                                          |
| 55             | Val       | -3.5                                          | -2.8                                          |
| 56             | Trp       | -3.8                                          | -2.7                                          |
| 57             | Gly       | -3.6                                          | -2.9                                          |
| 59             | Ile       | -3.8                                          | -3.0                                          |
| 61             | Met       | -3.9                                          | -2.9                                          |
| 66             | Val       | -3.6                                          | -2.9                                          |
| 71             | Ala       | -3.7                                          | -2.7                                          |
| 72             | Gln       | -3.8                                          | -3.0                                          |
| 74             | Leu       | -3.7                                          | -2.7                                          |
| 75             | Ala       | -3.8                                          | -2.9                                          |
| 76             | Lys       | -3.8                                          | -2.7                                          |
| 77             | Trp       | -3.8                                          | -2.6                                          |
| 78             | Val       | -4.1                                          | -2.9                                          |
| 79             | Leu       | -3.9                                          | -2.8                                          |

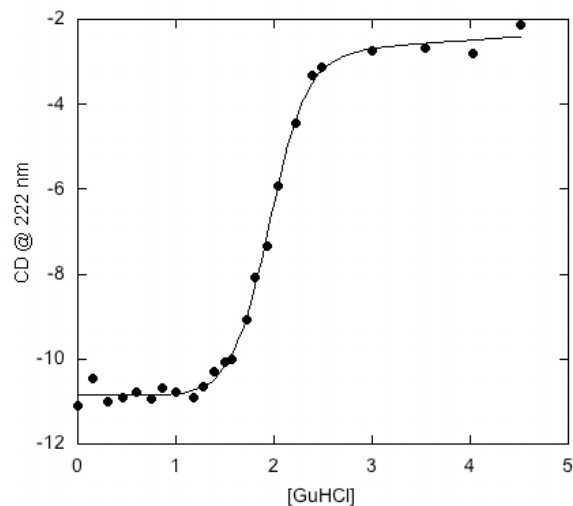

**Fig. S1** GuHCl denaturation curve monitored by circular dichroism spectroscopy for oxidized *Pa*-cyt *c*. The fit shown is to a two-state model, using the equation:

$$y = [(y_f + m_f[\text{GuHCl}]) + (y_u + m_u[\text{GuHCl}])e^{-\{(\Delta G(\text{H}_2\text{O}) - m[\text{GuHCl}])/RT\}}] / (1 + e^{-\{(\Delta G(\text{H}_2\text{O}) - m[\text{GuHCl}])/RT\}})$$

where “y” refers to the measured CD signal, and subscripts “u” and “f” refer to the unfolded and folded states (denatured and native conditions, respectively), and  $\Delta G(\text{H}_2\text{O})$  is the free energy of unfolding in the absence of denaturant.

The fitted parameters are:  $y_f = -10.8 \pm 0.37$  mdeg;  $y_u = -3.13 \pm 1.48$  mdeg;  $m_f = -0.02 \pm 0.47$  J/mol M;  $m_u = -0.16 \pm 0.40$  J/mol M;  $\Delta G(\text{H}_2\text{O}) = 25 \pm 6$  kJ/mol;  $m = 13 \pm 3$  kJ/mol M.

The concentrations of GuHCl used in this study, 0 to 1.4 M, correspond to 100 to 95% folded protein according to these data.

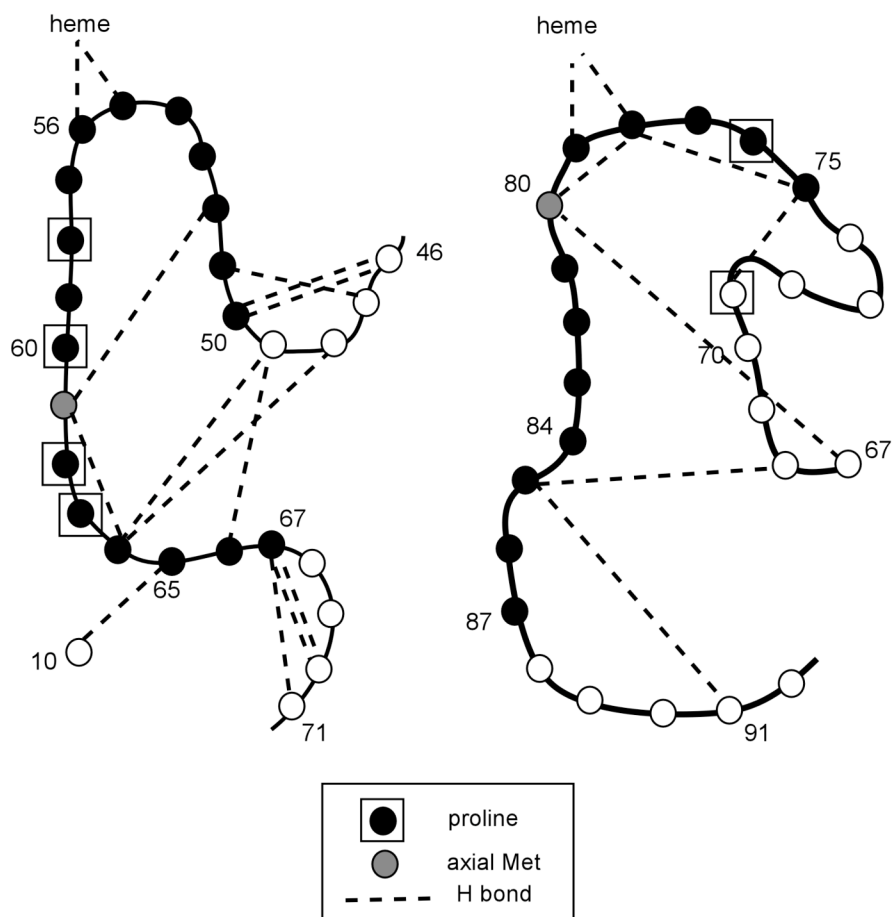

**Fig. S2** Hydrogen bonds with loop 3 residues, determined from crystal structures of *Pa* cyt *c*<sub>551</sub> (351C; left) and horse cyt *c* (1HRC; right). Filled circles represent residues with loop 3, and open circles non-loop 3 residues. Prolines are indicated with a box, and the heme axial Met with a gray circle. The geometric parameters used to determine the presence of a hydrogen bond are:  $r(\text{D-A}) < 3.5$  and  $\theta(\text{D-H-A}) > 150^\circ$  where D and A are the heavy-atom hydrogen bond donor and acceptor.
